# Supplementary material for: Hydrophobicity and Charge Shape Cellular Metabolite Concentrations
Source: PLoS Comput Biol. 2011 Oct 6;7(10):e1002166. doi: 10.1371/journal.pcbi.1002166 (PMC3188480; doi:10.1371/journal.pcbi.1002166)
Supplement: Dataset S1 — Metabolite concentrations as measured in various organisms and conditions alongside the physicochemical parameters of all metabolites. (XLS) [file pcbi.1002166.s002.xls]

## Sheet: Cellular Abundance
NM = not measured
Compound Name'	Compound Id, KEGG'	E. coli (mM), Glucose , Bennett et al. 2009'	E. coli (mM), Glycerol , Bennett et al. 2009'	E. coli (mM), Acetate , Bennett et al. 2009'	E. coli (mM), WT(Mar), Ishii et al. 2007'	E. coli (mM), WT(Jun), Ishii et al. 2007'	E. coli (mM), WT(Jul), Ishii et al. 2007'	E. coli (mM), WT(Sep), Ishii et al. 2007'	E. coli (mM), WT(Oct), Ishii et al. 2007'	Human muscle (mM), Bergstrom et al. 1974'	S. cerevisiae (umol/G CDW), Hake Flask (n=4) , Ewald et al. 2009'	S. cerevisiae (umol/G CDW), Plate 1 (n=20) , Ewald et al. 2009'	S. cerevisiae (umol/G CDW), Plate 2 (n=20) , Ewald et al. 2009'	S. cerevisiae (mM), Glucose, Fendt et al. 2010'	S. cerevisiae (mM), Galactose, Fendt et al. 2010'	S. cerevisiae (mM), Ethanol, Fendt et al. 2010'	S. cerevisiae (mM), CEN.PK 113-7D, Kummel et al. 2010'	S. cerevisiae (mM), CEN-PK JT4, Kummel et al. 2010'	S. cerevisiae (mM), FY4, Kummel et al. 2010'	Bacillus subtilis (mM), Glucose, Kleijn et al. 2010'	Bacillus subtilis (mM), Malate 1, Kleijn et al. 2010'	Bacillus subtilis (mM), Malate 2, Kleijn et al. 2010'
'ATP'	2	9.63	8.98	4.14	1.26	1.95	1.31	1.37	0.263	NM	NM	NM	NM	3.39	3.94	1.16	NM	NM	NM	NM	NM	NM
'NAD+'	3	2.55	4.08	2.43	0.585	0.763	0.793	1.25	0.209	NM	NM	NM	NM	0.47	0.57	0.14	1.504	1.344	0.996	NM	NM	NM
'NADH'	4	0.0832	0.129	0.135	NM	NM	NM	NM	NM	NM	NM	NM	NM	0.45	0.47	0.4	NM	NM	NM	NM	NM	NM
'NADPH'	5	0.115	0.255	0.267	NM	NM	0.163	NM	NM	NM	NM	NM	NM	0.07	0.08	0.07	NM	NM	NM	NM	NM	NM
'NADP+'	6	0.00208	NM	NM	0.0957	0.135	0.11	0.0699	0.0263	NM	NM	NM	NM	NM	NM	NM	NM	NM	NM	NM	NM	NM
'ADP'	8	0.555	0.149	0.189	0.605	0.89	0.564	0.58	0.173	NM	NM	NM	NM	0.63	0.72	0.59	0.561	0.56	0.339	NM	NM	NM
'CoA'	10	1.37	4.54	3.7	NM	NM	NM	NM	NM	NM	NM	NM	NM	NM	NM	NM	NM	NM	NM	0.13	0.16	0.23
'UDP'	15	1.79	NM	NM	0.444	2.49	0.386	0.887	0.561	NM	NM	NM	NM	NM	NM	NM	NM	NM	NM	NM	NM	NM
'FAD'	16	0.173	0.209	0.0493	0.0358	0.0273	0.0377	0.0279	0.00468	NM	NM	NM	NM	NM	NM	NM	NM	NM	NM	NM	NM	NM
'Pyridoxal phosphate'	18	NM	NM	NM	NM	0.244	NM	NM	NM	NM	NM	NM	NM	NM	NM	NM	NM	NM	NM	NM	NM	NM
'S-Adenosyl-L-methionine'	19	0.184	1.1	0.388	NM	0.166	0.0442	0.203	0.108	NM	NM	NM	NM	NM	NM	NM	NM	NM	NM	NM	NM	NM
'AMP'	20	0.281	0.156	0.101	0.653	0.704	0.7	0.543	0.253	NM	NM	NM	NM	0.16	0.17	0.19	0.121	0.194	0.055	NM	NM	NM
'S-Adenosyl-L-homocysteine'	21	NM	NM	NM	NM	NM	NM	NM	NM	NM	NM	NM	NM	NM	NM	NM	NM	NM	NM	NM	NM	NM
'Pyruvate'	22	NM	NM	NM	0.128	NM	NM	NM	NM	NM	NM	NM	NM	1.24	1.09	0.01	NM	NM	NM	8.9	NM	NM
'Acetyl-CoA'	24	0.606	0.734	0.628	NM	NM	NM	NM	NM	NM	NM	NM	NM	NM	NM	NM	21.536	18.143	25.204	0.03	0.03	0.04
'L-Glutamate'	25	96	149	44.8	3.64	3.02	4.27	3.26	3.18	4.38	68.59	48.5	37.69	81.75	86.97	85.08	NM	NM	NM	40.31	49.18	52.86
'2-Oxoglutarate'	26	0.443	0.616	0.446	NM	0.0301	NM	NM	NM	NM	0.77	1.37	1.36	1.11	1.26	0.14	1.716	1.663	2.067	0.78	5.74	6.14
'UDP-glucose'	29	2.5	1.12	0.553	1.64	0.212	1.91	0.9	0.0502	NM	NM	NM	NM	NM	NM	NM	NM	NM	NM	NM	NM	NM
'GDP'	35	0.676	0.0232	0.0177	0.224	0.34	0.18	0.335	0.0652	NM	NM	NM	NM	0.22	0.23	0.19	NM	NM	NM	NM	NM	NM
'Glycine'	37	NM	NM	NM	0.168	0.157	0.318	0.597	0.208	1.33	3.22	2.54	2.32	NM	NM	NM	1.406	2.464	0.807	NM	NM	NM
'L-Alanine'	41	2.55	1.77	0.879	0.203	0.182	0.358	0.628	0.23	2.34	6.59	6.7	4.91	24.71	26.07	6.23	9.677	8.841	11.4	4.19	9.92	10.35
'Succinate'	42	0.569	1.14	0.923	NM	0.0686	NM	0.0619	0.078	NM	0.63	1.11	0.86	0.34	0.5	1.56	1.382	1.476	0.56	5.84	NM	NM
'UDP-N-acetyl-D-glucosamine'	43	9.24	4.11	2.4	0.57	0.142	0.542	0.324	0.0378	NM	NM	NM	NM	NM	NM	NM	NM	NM	NM	NM	NM	NM
'GTP'	44	4.87	2.69	1.25	0.677	0.892	0.589	0.852	0.126	NM	NM	NM	NM	0.59	0.59	0.35	NM	NM	NM	NM	NM	NM
'L-Lysine'	47	0.405	0.762	0.554	0.323	0.388	0.361	0.199	0.402	1.15	6.48	4.85	3.68	NM	NM	NM	3.812	3.808	7.947	NM	NM	NM
'L-Aspartate'	49	4.23	9.3	7.35	0.241	0.231	0.337	0.579	0.255	NM	18.58	10.31	7.73	15.7	14.43	1.67	4.094	3.755	6.431	0.87	4.91	6.42
'Glutathione'	51	16.6	17.6	7.97	6.11	12.2	0.0506	8.76	12.4	NM	NM	NM	NM	NM	NM	NM	NM	NM	NM	NM	NM	NM
'CMP'	55	0.36	NM	NM	NM	NM	NM	NM	0.0649	NM	NM	NM	NM	NM	NM	NM	NM	NM	NM	NM	NM	NM
'FMN'	61	0.0537	0.00274	0.0531	0.0211	0.034	NM	0.0184	0.00618	NM	NM	NM	NM	NM	NM	NM	NM	NM	NM	NM	NM	NM
'L-Arginine'	62	0.569	NM	NM	0.0434	0.0624	0.0575	0.0888	0.0321	0.51	NM	NM	NM	35.82	29.81	8.69	NM	NM	NM	NM	NM	NM
'CTP'	63	2.73	1.4	1.15	0.32	0.371	0.282	0.26	0.0637	NM	NM	NM	NM	NM	NM	NM	NM	NM	NM	NM	NM	NM
'L-Glutamine'	64	3.77	0.4	0.193	0.569	0.449	0.494	1.32	0.371	19.45	NM	NM	NM	80.35	65.58	18.02	NM	NM	NM	3.87	9.38	36.6
'L-Serine'	65	0.0676	0.175	0.0975	0.202	0.156	0.343	0.661	0.182	0.98	8.46	5.04	3.98	NM	NM	NM	5.602	4.852	5.086	0.77	0.67	0.57
'L-Methionine'	73	0.145	0.129	0.0659	0.0343	0.0258	0.0303	0.0262	0.0423	0.11	NM	NM	NM	NM	NM	NM	0.223	0.197	0.206	0.14	0.27	0.25
'Phosphoenolpyruvate'	74	0.184	1.34	0.909	0.0911	0.175	NM	NM	0.0946	NM	NM	NM	NM	0.19	0.2	0.62	0.064	0.03	0.064	0.33	0.21	0.92
'UTP'	75	8.29	3.99	2.37	0.846	0.888	0.663	0.648	0.134	NM	NM	NM	NM	NM	NM	NM	NM	NM	NM	NM	NM	NM
'L-Ornithine'	77	0.0101	0.0303	0.064	0.0743	0.0939	0.12	0.0896	0.109	0.3	7.51	5.88	4.98	NM	NM	NM	NM	NM	NM	NM	NM	NM
'L-Tryptophan'	78	0.0115	0.00466	0.000896	NM	NM	0.00939	0.0121	NM	NM	NM	NM	NM	0.03	0.03	0.02	NM	NM	NM	1.05	2.33	2.83
'L-Phenylalanine'	79	0.0182	0.0421	0.0274	0.0557	0.0517	0.0657	0.0548	0.0535	0.07	0.59	0.74	0.43	0.35	0.34	0.24	0.428	0.39	0.222	0.13	0.09	0.04
'ITP'	81	0.205	NM	NM	0.21	0.314	0.207	0.214	0.0433	NM	NM	NM	NM	NM	NM	NM	NM	NM	NM	NM	NM	NM
'L-Tyrosine'	82	0.0289	0.0874	0.0522	NM	0.0271	0.0378	0.0451	0.0279	0.1	0.82	1.1	0.68	0.16	0.17	0.32	0.405	0.423	0.146	0.15	0.2	0.17
'Malonyl-CoA'	83	0.0345	NM	NM	NM	NM	NM	NM	NM	NM	NM	NM	NM	NM	NM	NM	NM	NM	NM	NM	NM	NM
'D-Fructose 6-phosphate'	85	NM	NM	NM	0.0545	0.045	0.0551	0.039	0.0259	NM	1.86	1.03	0.87	0.32	0.29	0.24	0.175	0.219	0.051	0.16	0.07	0.01
'Succinyl-CoA'	91	0.233	1.44	0.39	NM	NM	NM	NM	NM	NM	NM	NM	NM	NM	NM	NM	NM	NM	NM	NM	NM	NM
'D-Glucose 6-phosphate'	92	8.75	5.48	4.36	0.129	0.185	0.18	0.246	0.165	NM	7.82	4.56	4.19	3.7	3.82	1.29	1.282	1.335	0.548	0.43	0.23	0.11
'sn-Glycerol 3-phosphate'	93	0.049	0.813	0.246	0.112	0.372	NM	0.213	0.219	NM	0.28	0.34	0.26	0.5	0.39	0.09	NM	NM	NM	0.57	0.51	0.4
'L-Cysteine'	97	NM	NM	NM	NM	NM	NM	NM	NM	0.18	NM	NM	NM	NM	NM	NM	NM	NM	NM	NM	NM	NM
'beta-Alanine'	99	NM	NM	NM	NM	NM	0.0115	NM	0.00782	NM	NM	NM	NM	NM	NM	NM	NM	NM	NM	NM	NM	NM
'Propanoyl-CoA'	100	0.00532	NM	NM	NM	NM	NM	NM	NM	NM	NM	NM	NM	NM	NM	NM	NM	NM	NM	NM	NM	NM
'D-Glucose 1-phosphate'	103	NM	NM	NM	0.015	0.0317	0.0334	0.107	0.131	NM	NM	NM	NM	0.09	0.94	0.05	NM	NM	NM	0.23	0.12	0.02
'IDP'	104	0.0237	NM	NM	0.0973	0.117	0.0747	0.0775	0.0249	NM	NM	NM	NM	NM	NM	NM	NM	NM	NM	NM	NM	NM
'UMP'	105	NM	NM	NM	0.124	0.455	0.129	0.153	0.0746	NM	NM	NM	NM	NM	NM	NM	NM	NM	NM	NM	NM	NM
'Anthranilate'	108	0.00348	0.00266	0.00344	NM	NM	0.00507	NM	NM	NM	NM	NM	NM	NM	NM	NM	NM	NM	NM	NM	NM	NM
'Glycerone phosphate'	111	0.374	0.544	0.147	NM	NM	NM	NM	0.126	NM	NM	NM	NM	0.72	0.64	0.03	0.067	0.071	0.031	0.93	0.93	0.54
'CDP'	112	NM	NM	NM	0.115	0.34	0.144	0.25	0.0872	NM	NM	NM	NM	NM	NM	NM	NM	NM	NM	NM	NM	NM
'D-Ribose 5-phosphate'	117	1.32	1.02	0.686	0.0692	0.0127	NM	0.0268	NM	NM	0.62	0.45	0.42	0.41	0.49	0.02	0.06	0.068	0.013	0.24	0.2	0.07
'D-Glyceraldehyde 3-phosphate'	118	NM	NM	NM	NM	NM	NM	NM	NM	NM	NM	NM	NM	NM	NM	NM	NM	NM	NM	0.12	0.08	0.07
'5-Phospho-alpha-D-ribose 1-diphosphate'	119	0.258	0.153	0.0944	NM	NM	NM	NM	NM	NM	NM	NM	NM	NM	NM	NM	NM	NM	NM	NM	NM	NM
'Fumarate'	122	0.121	0.288	0.298	0.0696	0.0702	NM	NM	0.0315	NM	0.1	0.2	0.17	1.65	1.45	4.53	0.129	0.122	0.364	0.52	NM	NM
'L-Leucine'	123	0.303	0.438	0.341	NM	0.107	0.12	NM	NM	0.15	0.37	0.6	0.27	NM	NM	NM	0.301	0.242	0.248	1.23	1.93	0.91
'D-Galactose'	124	NM	NM	NM	NM	NM	NM	NM	NM	NM	NM	NM	NM	NM	NM	NM	NM	NM	NM	NM	NM	NM
'Glutathione disulfide'	127	2.37	7.31	1.68	NM	0.126	3.67	1.4	0.083	NM	NM	NM	NM	NM	NM	NM	NM	NM	NM	NM	NM	NM
'CMP-N-acetylneuraminate'	128	NM	NM	NM	0.0762	0.0107	0.169	NM	0.09	NM	NM	NM	NM	NM	NM	NM	NM	NM	NM	NM	NM	NM
'IMP'	130	0.272	NM	NM	0.133	0.116	0.113	0.0847	0.0477	NM	NM	NM	NM	NM	NM	NM	NM	NM	NM	NM	NM	NM
'dATP'	131	0.0155	0.051	0.0685	0.0756	0.0248	0.0588	0.0393	0.00292	NM	NM	NM	NM	NM	NM	NM	NM	NM	NM	NM	NM	NM
'Putrescine'	134	NM	NM	NM	NM	0.104	0.0695	0.138	0.143	NM	NM	NM	NM	NM	NM	NM	NM	NM	NM	NM	NM	NM
'L-Histidine'	135	0.068	0.15	0.0955	0.0593	0.0488	0.0524	0.184	0.048	0.37	3.85	2.78	2.12	NM	NM	NM	0.278	0.21	1.211	NM	NM	NM
'myo-Inositol'	137	0.00572	0.00705	0.0069	NM	NM	NM	NM	NM	NM	NM	NM	NM	NM	NM	NM	NM	NM	NM	NM	NM	NM
'GMP'	144	0.0238	NM	NM	0.0722	0.0791	0.0702	0.0559	0.0323	NM	NM	NM	NM	0.06	0.06	0.06	NM	NM	NM	NM	NM	NM
'Adenine'	147	0.00147	NM	NM	0.0743	0.217	0.102	0.199	0.196	NM	0.1	0.15	0.1	0.05	0.05	0.02	NM	NM	NM	NM	NM	NM
'L-Proline'	148	0.385	0.451	0.361	0.0625	0.0712	0.143	0.116	0.0779	0.83	0.86	1.12	0.84	NM	NM	NM	0.939	0.85	1.472	NM	NM	NM
'L-Asparagine'	152	0.511	0.97	0.54	0.0738	0.0834	0.103	0.216	0.0843	0.47	4.06	2.39	1.72	4.66	4.17	1.78	2.24	2.054	3.05	NM	NM	NM
'Nicotinamide'	153	NM	NM	NM	NM	0.0374	0.0442	0.0272	0.0347	NM	NM	NM	NM	NM	NM	NM	NM	NM	NM	NM	NM	NM
'4-Hydroxybenzoate'	156	0.0522	0.787	0.294	NM	NM	NM	NM	NM	NM	NM	NM	NM	NM	NM	NM	NM	NM	NM	NM	NM	NM
'Citrate'	158	1.96	2.32	21.9	NM	NM	NM	NM	NM	NM	4.69	3.13	2.43	1.47	1.96	6.02	4.373	3.528	3.204	NM	NM	NM
'Phenylpyruvate'	166	0.0898	0.195	0.148	NM	NM	NM	NM	NM	NM	NM	NM	NM	NM	NM	NM	NM	NM	NM	NM	NM	NM
'UDP-glucuronate'	167	0.566	0.375	0.188	0.115	0.0664	0.0834	0.0727	0.00839	NM	NM	NM	NM	NM	NM	NM	NM	NM	NM	NM	NM	NM
'Benzoate'	180	NM	NM	NM	NM	0.0644	NM	NM	0.0369	NM	NM	NM	NM	NM	NM	NM	NM	NM	NM	NM	NM	NM
'L-Valine'	183	4.02	2.29	1.07	NM	0.199	0.181	0.201	0.222	0.26	3	2.64	2.11	NM	NM	NM	3.306	3.11	2.29	6.01	10.89	2.76
'(S)-Lactate'	186	NM	NM	NM	NM	NM	NM	NM	NM	NM	NM	NM	NM	NM	NM	NM	NM	NM	NM	3.69	7.63	2.77
'L-Threonine'	188	0.179	NM	NM	NM	0.0883	0.147	0.264	0.0915	1.03	10.9	3.78	2.4	NM	NM	NM	8.162	6.636	8.623	0.81	2.21	0.83
'"2,3-Dihydroxybenzoate"'	196	0.138	0.414	0.274	NM	NM	NM	NM	NM	NM	NM	NM	NM	NM	NM	NM	NM	NM	NM	NM	NM	NM
'3-Phospho-D-glycerate'	197	1.54	4.08	1.51	0.543	0.746	NM	0.295	0.441	NM	NM	NM	NM	0.89	1.01	0.77	1.76	0.852	1.165	NM	NM	NM
'"D-Glucono-1,5-lactone"'	198	1.04	NM	NM	NM	NM	NM	NM	NM	NM	NM	NM	NM	NM	NM	NM	NM	NM	NM	NM	NM	NM
'D-Ribulose 5-phosphate'	199	NM	NM	NM	0.255	0.0983	0.0782	0.114	0.0933	NM	NM	NM	NM	0.02	0.02	NM	0.025	0.028	0.007	0.43	0.32	0.11
'dADP'	206	NM	NM	NM	0.0503	0.00919	0.0527	0.0285	NM	NM	NM	NM	NM	NM	NM	NM	NM	NM	NM	NM	NM	NM
'Maltose'	208	NM	NM	NM	NM	NM	NM	NM	NM	NM	0.2	0.2	0.14	NM	NM	NM	NM	NM	NM	NM	NM	NM
'Adenosine'	212	0.000131	NM	NM	0.0626	0.0682	0.0622	0.14	0.0853	NM	NM	NM	NM	NM	NM	NM	NM	NM	NM	NM	NM	NM
'Adenylyl sulfate'	224	0.00663	NM	NM	NM	NM	NM	NM	NM	NM	NM	NM	NM	NM	NM	NM	NM	NM	NM	NM	NM	NM
'Acetyl phosphate'	227	1.07	1.05	1.56	NM	NM	NM	NM	NM	NM	NM	NM	NM	NM	NM	NM	NM	NM	NM	NM	NM	NM
'D-Xylulose 5-phosphate'	231	NM	NM	NM	NM	NM	NM	NM	NM	NM	NM	NM	NM	NM	NM	NM	0.002	0.002	0.001	NM	NM	NM
'3-Phospho-D-glyceroyl phosphate'	236	NM	NM	NM	NM	NM	NM	NM	NM	NM	NM	NM	NM	NM	NM	NM	NM	NM	NM	NM	NM	NM
'dCMP'	239	NM	NM	NM	0.00695	NM	NM	NM	NM	NM	NM	NM	NM	NM	NM	NM	NM	NM	NM	NM	NM	NM
'Guanine'	242	0.188	0.00331	NM	0.03	0.0554	0.0651	0.0754	0.0671	NM	NM	NM	NM	NM	NM	NM	NM	NM	NM	NM	NM	NM
'Riboflavin'	255	0.019	0.0221	0.0188	NM	NM	NM	NM	NM	NM	NM	NM	NM	NM	NM	NM	NM	NM	NM	NM	NM	NM
'D-Gluconic acid'	257	0.0416	NM	NM	NM	NM	NM	NM	NM	NM	NM	NM	NM	NM	NM	NM	NM	NM	NM	NM	NM	NM
'D-Glycerate'	258	1.35	0.931	0.516	NM	NM	NM	NM	NM	NM	NM	NM	NM	NM	NM	NM	NM	NM	NM	NM	NM	NM
'Hypoxanthine'	262	NM	NM	NM	0.176	0.306	0.277	0.336	0.379	NM	NM	NM	NM	NM	NM	NM	NM	NM	NM	NM	NM	NM
'L-Homoserine'	263	NM	NM	NM	0.00599	0.00488	0.0161	NM	0.00971	NM	0.91	0.78	0.65	NM	NM	NM	NM	NM	NM	NM	NM	NM
'D-Erythrose 4-phosphate'	279	NM	NM	NM	NM	NM	NM	NM	NM	NM	NM	NM	NM	NM	NM	NM	NM	NM	NM	NM	NM	NM
'Inosine'	294	NM	NM	NM	0.0219	0.0256	0.0311	0.0521	0.0402	NM	NM	NM	NM	NM	NM	NM	NM	NM	NM	NM	NM	NM
'Orotate'	295	NM	NM	NM	NM	NM	NM	NM	NM	NM	NM	NM	NM	NM	NM	NM	NM	NM	NM	NM	NM	NM
'Quinate'	296	NM	NM	NM	NM	NM	NM	0.13	NM	NM	NM	NM	NM	NM	NM	NM	NM	NM	NM	NM	NM	NM
'Uridine'	299	2.09	NM	NM	NM	NM	NM	NM	NM	NM	NM	NM	NM	NM	NM	NM	NM	NM	NM	NM	NM	NM
'Creatine'	300	NM	NM	NM	NM	NM	0.00872	NM	NM	NM	NM	NM	NM	NM	NM	NM	NM	NM	NM	NM	NM	NM
'ADP-ribose'	301	NM	NM	NM	0.0221	0.00624	0.0262	0.0195	0.00204	NM	NM	NM	NM	NM	NM	NM	NM	NM	NM	NM	NM	NM
'Isocitrate'	311	NM	NM	NM	NM	NM	NM	NM	NM	NM	NM	NM	NM	0.19	0.18	0.61	NM	NM	NM	0.26	0.2	0.26
'Pyridoxine'	314	NM	NM	NM	NM	NM	0.00117	NM	NM	NM	NM	NM	NM	NM	NM	NM	NM	NM	NM	NM	NM	NM
'L-Carnitine'	318	NM	NM	NM	NM	NM	0.00399	NM	0.00169	NM	NM	NM	NM	NM	NM	NM	NM	NM	NM	NM	NM	NM
'L-Citrulline'	327	1.41	NM	NM	0.0622	0.0575	0.0384	0.126	0.0554	0.04	NM	NM	NM	NM	NM	NM	NM	NM	NM	18.11	8.7	7.44
'D-Glucosamine'	329	NM	NM	NM	NM	NM	0.0192	0.0799	0.0244	NM	NM	NM	NM	NM	NM	NM	NM	NM	NM	NM	NM	NM
'Deoxyguanosine'	330	0.000522	NM	NM	NM	NM	NM	NM	NM	NM	NM	NM	NM	NM	NM	NM	NM	NM	NM	NM	NM	NM
'Acetoacetyl-CoA'	332	0.0218	NM	NM	NM	NM	NM	NM	NM	NM	NM	NM	NM	NM	NM	NM	NM	NM	NM	NM	NM	NM
'4-Aminobutanoate'	334	NM	NM	NM	0.0416	0.0347	0.0436	0.0741	0.036	NM	NM	NM	NM	NM	NM	NM	NM	NM	NM	NM	NM	NM
'(S)-Dihydroorotate'	337	0.0121	0.0236	0.0205	NM	NM	NM	NM	NM	NM	NM	NM	NM	NM	NM	NM	NM	NM	NM	NM	NM	NM
'6-Phospho-D-gluconate'	345	3.81	4.95	3.06	NM	NM	NM	NM	NM	NM	1.58	0.71	0.6	0.87	0.9	0.07	0.76	0.751	0.489	1.13	0.76	0.22
'D-Glucosamine 6-phosphate'	352	1.15	0.378	0.316	0.402	0.604	0.34	0.708	0.494	NM	NM	NM	NM	NM	NM	NM	NM	NM	NM	NM	NM	NM
'"D-Fructose 1,6-bisphosphate"'	354	15.2	5.85	NM	NM	0.0312	NM	NM	0.0207	NM	NM	NM	NM	8.76	6.93	0.18	1.543	1.511	1.017	7.63	6.23	1.54
'N-Acetyl-D-glucosamine 6-phosphate'	357	NM	NM	NM	NM	NM	NM	NM	NM	NM	NM	NM	NM	NM	NM	NM	NM	NM	NM	NM	NM	NM
'dAMP'	360	0.00884	NM	NM	0.0122	NM	0.0145	0.00474	0.00115	NM	NM	NM	NM	NM	NM	NM	NM	NM	NM	NM	NM	NM
'dGMP'	362	0.0507	NM	NM	NM	NM	NM	NM	NM	NM	NM	NM	NM	NM	NM	NM	NM	NM	NM	NM	NM	NM
'dTDP'	363	0.378	NM	NM	NM	NM	NM	NM	NM	NM	NM	NM	NM	NM	NM	NM	NM	NM	NM	NM	NM	NM
'dTMP'	364	NM	NM	NM	NM	NM	NM	NM	NM	NM	NM	NM	NM	NM	NM	NM	NM	NM	NM	NM	NM	NM
'Cytosine'	380	0.0141	NM	NM	0.00553	0.0048	0.00982	NM	0.00994	NM	NM	NM	NM	NM	NM	NM	NM	NM	NM	NM	NM	NM
'Guanosine'	387	0.00162	NM	NM	0.019	0.019	0.0253	0.0478	0.0355	NM	NM	NM	NM	NM	NM	NM	NM	NM	NM	NM	NM	NM
'L-Isoleucine'	407	NM	NM	NM	NM	NM	0.0331	NM	NM	0.11	0.66	0.86	0.53	NM	NM	NM	0.82	0.718	0.534	0.37	0.99	0.41
'L-Pipecolate'	408	NM	NM	NM	NM	NM	0.00605	NM	NM	NM	NM	NM	NM	NM	NM	NM	NM	NM	NM	NM	NM	NM
'cis-Aconitate'	417	0.0161	0.0959	0.0723	NM	NM	NM	NM	NM	NM	NM	NM	NM	NM	NM	NM	NM	NM	NM	NM	NM	NM
'trans-Cinnamate'	423	NM	NM	NM	0.0994	0.0681	0.136	0.0956	0.0702	NM	NM	NM	NM	NM	NM	NM	NM	NM	NM	NM	NM	NM
'N-Acetylornithine'	437	0.0433	0.398	0.152	NM	0.00704	0.0141	0.0244	0.00928	NM	NM	NM	NM	NM	NM	NM	NM	NM	NM	NM	NM	NM
'N-Carbamoyl-L-aspartate'	438	0.59	0.0902	0.0266	NM	0.609	0.562	0.441	0.446	NM	NM	NM	NM	NM	NM	NM	NM	NM	NM	NM	NM	NM
'dCTP'	458	0.0352	0.083	0.146	0.0359	0.0354	0.017	0.0305	0.00804	NM	NM	NM	NM	NM	NM	NM	NM	NM	NM	NM	NM	NM
'dTTP'	459	4.62	0.525	0.667	NM	NM	NM	NM	NM	NM	NM	NM	NM	NM	NM	NM	NM	NM	NM	NM	NM	NM
'Cytidine'	475	0.00259	NM	NM	0.00413	NM	0.00836	NM	NM	NM	NM	NM	NM	NM	NM	NM	NM	NM	NM	NM	NM	NM
'Tyramine'	483	NM	NM	NM	NM	NM	0.0075	NM	NM	NM	NM	NM	NM	NM	NM	NM	NM	NM	NM	NM	NM	NM
'Shikimate'	493	0.0141	NM	NM	NM	NM	NM	NM	NM	NM	NM	NM	NM	NM	NM	NM	NM	NM	NM	0.07	0.05	0.01
'ADP-glucose'	498	0.00427	NM	NM	0.0126	NM	0.00715	0.0183	NM	NM	NM	NM	NM	NM	NM	NM	NM	NM	NM	NM	NM	NM
'Deoxyadenosine'	559	0.00282	NM	NM	NM	NM	NM	NM	NM	NM	NM	NM	NM	NM	NM	NM	NM	NM	NM	NM	NM	NM
'"3',5'-Cyclic AMP"'	575	0.0354	NM	NM	0.00559	0.00785	0.0085	0.00552	0.00223	NM	NM	NM	NM	NM	NM	NM	0.00088	0.00093	0.00047	NM	NM	NM
'N-Acetyl-L-glutamate'	624	NM	NM	NM	0.0113	0.00983	NM	NM	0.00807	NM	NM	NM	NM	NM	NM	NM	NM	NM	NM	NM	NM	NM
'Pyridoxamine phosphate'	647	NM	NM	NM	NM	0.0298	0.0403	0.0457	0.0434	NM	NM	NM	NM	NM	NM	NM	NM	NM	NM	NM	NM	NM
'"LL-2,6-Diaminoheptanedioate"'	666	NM	NM	NM	NM	0.105	0.0581	NM	NM	NM	NM	NM	NM	NM	NM	NM	NM	NM	NM	NM	NM	NM
'2-Deoxy-D-ribose 5-phosphate'	673	0.303	NM	NM	NM	NM	NM	NM	NM	NM	NM	NM	NM	NM	NM	NM	NM	NM	NM	NM	NM	NM
'dCDP'	705	NM	NM	NM	0.0373	0.029	0.036	0.0297	0.0129	NM	NM	NM	NM	NM	NM	NM	NM	NM	NM	NM	NM	NM
'Malate'	711	1.68	3.45	3.33	0.0471	0.0835	0.0889	NM	0.0551	NM	0.79	0.91	0.66	1.68	1.47	4.46	0.88	1.171	1.97	0.57	NM	NM
'Pterin'	715	NM	NM	NM	0.0239	0.0171	0.04	0.0252	0.0235	NM	NM	NM	NM	NM	NM	NM	NM	NM	NM	NM	NM	NM
'Pyridine'	747	NM	NM	NM	NM	0.00334	NM	0.00403	0.00633	NM	NM	NM	NM	NM	NM	NM	NM	NM	NM	NM	NM	NM
'Urocanate'	785	NM	NM	NM	NM	NM	0.09	0.132	0.0412	NM	NM	NM	NM	NM	NM	NM	NM	NM	NM	NM	NM	NM
'Creatinine'	791	NM	NM	NM	NM	NM	0.00372	NM	NM	NM	NM	NM	NM	NM	NM	NM	NM	NM	NM	NM	NM	NM
'L-Histidinol'	860	0.0128	0.0192	0.0196	NM	0.00278	0.00155	NM	0.00262	NM	NM	NM	NM	NM	NM	NM	NM	NM	NM	NM	NM	NM
'Pantothenate'	864	NM	NM	NM	0.018	0.0123	0.058	0.0166	0.0167	NM	NM	NM	NM	0.21	0.21	0.1	NM	NM	NM	NM	NM	NM
'"3',5'-Cyclic GMP"'	942	NM	NM	NM	NM	NM	NM	0.027	0.017	NM	NM	NM	NM	NM	NM	NM	NM	NM	NM	NM	NM	NM
'L-2-Aminoadipate'	956	NM	NM	NM	NM	0.0118	0.0115	0.02	0.0126	NM	NM	NM	NM	NM	NM	NM	NM	NM	NM	NM	NM	NM
'O-Acetyl-L-serine'	979	NM	NM	NM	NM	0.0233	NM	NM	0.0216	NM	NM	NM	NM	NM	NM	NM	NM	NM	NM	NM	NM	NM
'O-Phospho-L-serine'	1005	NM	NM	NM	NM	NM	NM	NM	NM	NM	NM	NM	NM	NM	NM	NM	NM	NM	NM	NM	NM	NM
'4-Hydroxy-L-proline'	1015	NM	NM	NM	NM	NM	0.00626	NM	NM	NM	NM	NM	NM	NM	NM	NM	NM	NM	NM	NM	NM	NM
'"N,N-Dimethylglycine"'	1026	NM	NM	NM	0.0057	NM	0.00618	NM	NM	NM	NM	NM	NM	NM	NM	NM	NM	NM	NM	NM	NM	NM
'N8-Acetylspermidine'	1029	NM	NM	NM	NM	NM	0.000844	NM	NM	NM	NM	NM	NM	NM	NM	NM	NM	NM	NM	NM	NM	NM
'4-Guanidinobutanoate'	1035	NM	NM	NM	NM	NM	0.0023	NM	NM	NM	NM	NM	NM	NM	NM	NM	NM	NM	NM	NM	NM	NM
'N-Acetyl-L-aspartate'	1042	NM	NM	NM	0.055	0.0522	0.0564	0.043	0.0544	NM	NM	NM	NM	NM	NM	NM	NM	NM	NM	NM	NM	NM
'Thiamin monophosphate'	1081	NM	NM	NM	0.0507	0.315	0.0248	0.0751	0.0322	NM	NM	NM	NM	NM	NM	NM	NM	NM	NM	NM	NM	NM
'D-Fructose 1-phosphate'	1094	NM	NM	NM	NM	NM	NM	NM	NM	NM	NM	NM	NM	NM	NM	NM	0.037	0.04	0.023	NM	NM	NM
'Sorbitol 6-phosphate'	1096	NM	NM	NM	0.0536	0.0717	0.0612	0.0858	0.0787	NM	NM	NM	NM	NM	NM	NM	NM	NM	NM	NM	NM	NM
'Trimethylamine N-oxide'	1104	NM	NM	NM	NM	NM	0.00492	NM	NM	NM	NM	NM	NM	NM	NM	NM	NM	NM	NM	NM	NM	NM
'Cys-Gly'	1419	NM	NM	NM	NM	NM	NM	NM	0.0205	NM	NM	NM	NM	NM	NM	NM	NM	NM	NM	NM	NM	NM
'Glu-Glu'	1425	NM	NM	NM	NM	NM	0.00634	NM	NM	NM	NM	NM	NM	NM	NM	NM	NM	NM	NM	NM	NM	NM
'Hexanoic acid'	1585	NM	NM	NM	NM	NM	0.0795	NM	NM	NM	NM	NM	NM	NM	NM	NM	NM	NM	NM	NM	NM	NM
'Octylamine'	1740	NM	NM	NM	NM	NM	0.0017	NM	NM	NM	NM	NM	NM	NM	NM	NM	NM	NM	NM	NM	NM	NM
'Piperidine'	1746	NM	NM	NM	NM	NM	0.00195	NM	NM	NM	NM	NM	NM	NM	NM	NM	NM	NM	NM	NM	NM	NM
'Homocystine'	1817	0.37	NM	NM	NM	NM	NM	NM	NM	NM	NM	NM	NM	NM	NM	NM	NM	NM	NM	NM	NM	NM
'5-Oxoproline'	1879	NM	NM	NM	NM	0.0876	0.265	0.451	0.0848	NM	NM	NM	NM	NM	NM	NM	NM	NM	NM	NM	NM	NM
'Acetylcholine'	1996	NM	NM	NM	0.000908	NM	0.00248	NM	NM	NM	NM	NM	NM	NM	NM	NM	NM	NM	NM	NM	NM	NM
'Methylmalonate'	2170	NM	NM	NM	NM	NM	NM	NM	NM	NM	NM	NM	NM	NM	NM	NM	NM	NM	NM	NM	NM	NM
'2-Methylmaleate'	2226	NM	NM	NM	0.0127	0.0262	0.04	0.0223	0.0139	NM	NM	NM	NM	NM	NM	NM	NM	NM	NM	NM	NM	NM
'Castanospermine'	2256	NM	NM	NM	NM	NM	0.00621	NM	NM	NM	NM	NM	NM	NM	NM	NM	NM	NM	NM	NM	NM	NM
'5-Methylcytosine'	2376	NM	NM	NM	NM	NM	0.00263	NM	NM	NM	NM	NM	NM	NM	NM	NM	NM	NM	NM	NM	NM	NM
'1-Methyladenosine'	2494	NM	NM	NM	NM	NM	0.00155	NM	NM	NM	NM	NM	NM	NM	NM	NM	NM	NM	NM	NM	NM	NM
'3-Methylbutanamine'	2640	NM	NM	NM	NM	NM	0.00191	NM	NM	NM	NM	NM	NM	NM	NM	NM	NM	NM	NM	NM	NM	NM
'Dodecanedioic acid'	2678	NM	NM	NM	NM	0.00346	NM	NM	NM	NM	NM	NM	NM	NM	NM	NM	NM	NM	NM	NM	NM	NM
'Monomethyl sulfate'	2704	NM	NM	NM	0.102	0.16	0.115	0.119	NM	NM	NM	NM	NM	NM	NM	NM	NM	NM	NM	NM	NM	NM
'N-Acetylputrescine'	2714	NM	NM	NM	NM	NM	0.0056	NM	NM	NM	NM	NM	NM	NM	NM	NM	NM	NM	NM	NM	NM	NM
'2-Methylpropanamine'	2787	NM	NM	NM	0.00794	0.0338	0.00594	0.014	0.0214	NM	NM	NM	NM	NM	NM	NM	NM	NM	NM	NM	NM	NM
'3-Guanidinopropanoate'	3065	NM	NM	NM	NM	NM	0.00258	NM	NM	NM	NM	NM	NM	NM	NM	NM	NM	NM	NM	NM	NM	NM
'Dimethylbenzimidazole'	3114	NM	NM	NM	NM	NM	0.00126	NM	NM	NM	NM	NM	NM	NM	NM	NM	NM	NM	NM	NM	NM	NM
'"L-2,4-Diaminobutanoate"'	3283	NM	NM	NM	NM	0.0443	0.0259	0.0617	0.044	NM	NM	NM	NM	NM	NM	NM	NM	NM	NM	NM	NM	NM
'L-3-Amino-isobutanoate'	3284	NM	NM	NM	NM	0.00845	0.00819	NM	0.00859	NM	NM	NM	NM	NM	NM	NM	NM	NM	NM	NM	NM	NM
'"2,3-Bisphosphoglycerate"'	3339	NM	NM	NM	NM	0.00832	NM	NM	NM	NM	NM	NM	NM	NM	NM	NM	NM	NM	NM	0.1	0.07	0.07
'N-(L-Arginino)succinate'	3406	NM	NM	NM	NM	0.0368	NM	NM	NM	NM	NM	NM	NM	NM	NM	NM	NM	NM	NM	NM	NM	NM
'(R)-S-Lactoylglutathione'	3451	NM	NM	NM	0.00869	0.0182	NM	0.0111	0.0289	NM	NM	NM	NM	NM	NM	NM	NM	NM	NM	NM	NM	NM
'"Pyridine-2,3-dicarboxylate"'	3722	0.0119	0.00458	0.00359	NM	NM	NM	NM	NM	NM	NM	NM	NM	NM	NM	NM	NM	NM	NM	NM	NM	NM
'N6-Methyl-2'-deoxyadenosine'	3795	NM	NM	NM	NM	NM	0.00187	NM	NM	NM	NM	NM	NM	NM	NM	NM	NM	NM	NM	NM	NM	NM
'1-Phospho-alpha-D-galacturonate'	4037	NM	NM	NM	0.0347	NM	NM	NM	NM	NM	NM	NM	NM	NM	NM	NM	NM	NM	NM	NM	NM	NM
'N-Acetyl-D-glucosamine 1-phosphate'	4256	0.0819	NM	NM	NM	0.00628	NM	NM	NM	NM	NM	NM	NM	NM	NM	NM	NM	NM	NM	NM	NM	NM
'Nicotinamide hypoxanthine dinucleotide'	4423	NM	NM	NM	0.141	0.172	0.194	0.17	0.0593	NM	NM	NM	NM	NM	NM	NM	NM	NM	NM	NM	NM	NM
'"1-Methyl-4-phenyl-1,2,3,6-tetrahydropyridine"'	4599	NM	NM	NM	NM	NM	0.000778	NM	NM	NM	NM	NM	NM	NM	NM	NM	NM	NM	NM	NM	NM	NM
'4-(beta-Acetylaminoethyl)imidazole'	5135	NM	NM	NM	NM	NM	0.00215	NM	NM	NM	NM	NM	NM	NM	NM	NM	NM	NM	NM	NM	NM	NM
'Sedoheptulose 7-phosphate'	5382	NM	NM	NM	0.216	0.178	0.334	0.18	0.2	NM	NM	NM	NM	NM	NM	NM	NM	NM	NM	NM	NM	NM
'1-Aminopropan-2-ol'	5771	NM	NM	NM	NM	NM	0.0146	NM	NM	NM	NM	NM	NM	NM	NM	NM	NM	NM	NM	NM	NM	NM
'2-Oxopentanoic acid'	6255	NM	NM	NM	0.281	NM	NM	NM	NM	NM	NM	NM	NM	NM	NM	NM	NM	NM	NM	NM	NM	NM
'Octanoic acid'	6423	NM	NM	NM	NM	NM	0.0795	NM	NM	NM	NM	NM	NM	NM	NM	NM	NM	NM	NM	NM	NM	NM
'2-Keto-D-gluconic acid'	6473	NM	NM	NM	NM	NM	NM	NM	NM	NM	NM	NM	NM	NM	NM	NM	NM	NM	NM	NM	NM	NM
'Hydroxyatrazine'	6552	NM	NM	NM	NM	NM	0.00148	NM	NM	NM	NM	NM	NM	NM	NM	NM	NM	NM	NM	NM	NM	NM
'Triethanolamine'	6771	NM	NM	NM	NM	0.00851	0.0143	0.178	0.00342	NM	NM	NM	NM	NM	NM	NM	NM	NM	NM	NM	NM	NM
'Diethanolamine'	6772	NM	NM	NM	0.0166	NM	0.00986	0.0376	0.00738	NM	NM	NM	NM	NM	NM	NM	NM	NM	NM	NM	NM	NM
'Tolazoline'	7147	NM	NM	NM	NM	NM	0.00141	NM	NM	NM	NM	NM	NM	NM	NM	NM	NM	NM	NM	NM	NM	NM
'Tromethamine'	7182	NM	NM	NM	NM	NM	NM	NM	0.00767	NM	NM	NM	NM	NM	NM	NM	NM	NM	NM	NM	NM	NM
'Azelaic acid'	8261	NM	NM	NM	0.00406	0.018	0.0255	0.0286	0.0182	NM	NM	NM	NM	NM	NM	NM	NM	NM	NM	NM	NM	NM
'Sebacic acid'	8277	NM	NM	NM	NM	0.00232	NM	0.00581	NM	NM	NM	NM	NM	NM	NM	NM	NM	NM	NM	NM	NM	NM
'Melamine'	8737	NM	NM	NM	0.0054	0.0121	0.0126	0.00714	NM	NM	NM	NM	NM	NM	NM	NM	NM	NM	NM	NM	NM	NM
'Benzylsuccinate'	9816	NM	NM	NM	NM	0.00231	NM	NM	NM	NM	NM	NM	NM	NM	NM	NM	NM	NM	NM	NM	NM	NM
'Pseudopelletierine'	10865	NM	NM	NM	0.000642	NM	0.00185	NM	NM	NM	NM	NM	NM	NM	NM	NM	NM	NM	NM	NM	NM	NM
'2-Benzimidazolylguanidine'	10898	NM	NM	NM	NM	NM	0.00239	NM	NM	NM	NM	NM	NM	NM	NM	NM	NM	NM	NM	NM	NM	NM
'Leu-leu-tyr'	11331	NM	NM	NM	NM	NM	0.00156	NM	NM	NM	NM	NM	NM	NM	NM	NM	NM	NM	NM	NM	NM	NM
'Heptanoic acid'	17714	NM	NM	NM	NM	NM	0.118	NM	NM	NM	NM	NM	NM	NM	NM	NM	NM	NM	NM	NM	NM	NM

## Sheet: Physicochemical Parameters
NA = not available
Compound Name'	Compound Id, KEGG'	'Molecular Weight'	'Total Surface Area'	'Polar Surface Area'	'NoN-Polar Surface Area'	Charge'	'Absolute Formal Charge'	'# Number of Charged Atoms'	'# Hydrogen Donors'	'# Hydrogen Acceptors'	'# Hydrogen TOTAL'	# Rotatable Bonds'	'XLOGP3'	'ALogP'	'ALogS'	'LogP (SciFInder)'	'LogD, pH7 (SciFInder)'	'Is amino-acid?'
'ATP'	2	503.15	650.32	494.2	156.11	-4	4	4	3	16	19	8	-5.74	-0.84	-2.05	-3.652	-9.46	0
'NAD+'	3	662.42	872.26	548.09	324.17	-1	1	3	7	18	25	11	-5.22	-1.25	-2.34	NA	NA	0
'NADH'	4	663.43	873.5	553.48	320.02	-2	2	2	7	18	25	11	-5.04	-1.74	-2.19	-3.68	-8.18	0
'NADPH'	5	741.39	915.79	619.29	296.5	-4	4	4	6	21	27	13	-6.13	-1.24	-1.98	NA	NA	0
'NADP+'	6	740.38	917.03	616.13	300.9	-3	3	5	6	21	27	13	-6.31	-0.88	-2.1	NA	NA	0
'ADP'	8	424.18	575.8	419.69	156.11	-3	3	3	3	13	16	6	-4.65	-1.65	-2.12	-2.692	-7.49	0
'CoA'	10	763.5	906.21	584.05	322.16	-4	4	4	5	21	26	18	-5.06	-0.63	-2.16	-4.358	-10.58	0
'UDP'	15	401.14	553.04	428.12	124.91	-3	3	3	3	13	16	6	-3.51	-1.69	-1.52	-2.954	-7.76	0
'FAD'	16	783.53	930.68	572.29	358.39	-2	2	2	7	21	28	13	-3.64	-0.93	-2.44	-1.336	-5.83	0
'Pyridoxal phosphate'	18	245.13	398.88	250.06	148.82	-2	2	2	1	7	8	4	-1.07	-0.55	-1.64	-1.921	-6.16	0
'S-Adenosyl-L-methionine'	19	399.45	548.19	310.57	237.63	1	1	3	4	8	12	7	-3.46	0.05	-2.45	NA	NA	0
'AMP'	20	345.21	501.29	345.18	156.11	-2	2	2	3	10	13	4	-3.55	-3.13	-2.02	-3.19	-7.25	0
'S-Adenosyl-L-homocysteine'	21	384.41	591.13	383.69	207.44	0	0	2	4	8	12	7	-3.47	-2.37	-1.97	NA	NA	0
'Pyruvate'	22	87.054	218.01	138.51	79.502	-1	1	1	0	3	3	1	0.56	-0.38	0.18	-1.24	-4.89	0
'Acetyl-CoA'	24	805.54	953.4	580.17	373.23	-4	4	4	5	22	27	20	-4.92	-0.36	-2.15	-4.646	-10.87	0
'L-Glutamate'	25	146.12	309.14	246.5	62.646	-1	1	3	1	4	5	4	-1.18	-3.54	-0.26	-0.969	-4.46	1
'2-Oxoglutarate'	26	144.08	287.68	222.77	64.91	-2	2	2	0	5	5	4	1.43	-0.6	-0.44	-1.721	-6.45	0
'UDP-glucose'	29	564.29	715.17	516.29	198.88	-2	2	2	7	18	25	9	-5.11	-1.87	-1.43	-4.631	-9.13	0
'GDP'	35	440.18	589.22	465.69	123.53	-3	3	3	5	14	19	6	-3.7	-1.73	-1.94	-3.569	-8.37	0
'Glycine'	37	75.067	214.73	169.7	45.034	0	0	2	1	2	3	1	-2.52	-3.34	0.87	-0.928	-3.43	1
'L-Alanine'	41	89.093	234.89	158.66	76.232	0	0	2	1	2	3	1	-2.11	-3.05	0.7	-0.574	-3.07	1
'Succinate'	42	116.07	259.65	191.97	67.677	-2	2	2	0	4	4	3	2.11	-0.53	0.25	-0.933	-5.03	0
'UDP-N-acetyl-D-glucosamine'	43	605.34	731.27	524.71	206.55	-2	2	2	7	19	26	10	-4.78	-2.07	-1.48	-4.641	-9.14	0
'GTP'	44	519.15	663.74	540.2	123.53	-4	4	4	5	17	22	8	-4.8	-0.97	-1.84	-4.529	10.49	0
'L-Lysine'	47	147.2	341.85	233.17	108.69	1	1	3	2	2	4	5	-2.35	-3.76	-0.14	-0.734	-4.22	1
'L-Aspartate'	49	132.09	270.86	221.3	49.563	-1	1	3	1	4	5	3	-1.54	-3.52	0.03	-1.075	-4.57	1
'Glutathione'	51	306.32	445.14	362.11	83.024	-1	1	3	3	8	11	9	-1.67	-2.27	-3.1	-1.645	-5.15	0
'CMP'	55	321.18	478.61	354.58	124.03	-2	2	2	4	10	14	4	-2.33	-2.4	-1.39	-5.134	-9.21	0
'FMN'	61	454.33	564.4	358.35	206.05	-2	2	2	4	12	16	7	-1.08	-0.7	-2.59	-1.747	-5.83	0
'L-Arginine'	62	175.21	367.01	281.72	85.289	2	2	4	4	2	6	6	-2.94	-3.49	-1.88	-1.652	-5.14	1
'CTP'	63	479.12	627.63	503.6	124.03	-4	4	4	4	16	20	8	-4.52	-0.96	-1.68	-5.596	-11.4	0
'L-Glutamine'	64	146.14	310.53	248.64	61.891	0	0	2	3	4	7	4	-2.54	-3.39	-1.63	-1.576	-4.08	1
'L-Serine'	65	105.09	245.14	194.06	51.073	0	0	2	2	3	5	2	-3.17	-3.42	0.66	-1.49	-3.99	1
'L-Methionine'	73	149.21	318.36	194.46	123.91	0	0	2	1	2	3	4	-1.47	-1.85	-0.8	0.217	-2.28	1
'Phosphoenolpyruvate'	74	165.02	288.18	216.1	72.08	-3	3	3	0	6	6	3	-0.19	-1.22	-1.1	-1.695	-7.17	0
'UTP'	75	480.11	627.55	502.63	124.91	-4	4	4	3	16	19	8	-4.61	-0.71	-1.62	-3.914	-9.73	0
'L-Ornithine'	77	133.17	314.54	230.76	83.779	1	1	3	2	2	4	4	-2.71	-3.64	0.11	-0.874	-4.33	1
'L-Tryptophan'	78	204.23	355.43	161.07	194.35	0	0	2	2	2	4	3	-0.58	-1.1	-2.18	0.704	-1.8	1
'L-Phenylalanine'	79	165.19	319.12	134.08	185.04	0	0	2	1	2	3	3	-0.53	-1.35	-1.6	0.235	-2.27	1
'ITP'	81	504.13	648.9	491.91	156.99	-4	4	4	3	17	20	8	-5.42	-0.67	-2.03	-4.689	-10.5	0
'L-Tyrosine'	82	181.19	335.44	185.11	150.32	0	0	2	2	3	5	3	-0.88	-2.39	-1.37	-0.418	-2.92	1
'Malonyl-CoA'	83	848.54	970.77	634.9	335.87	-5	5	5	5	24	29	22	-4.34	-0.5	-2.18	-5.227	-12.7	0
'D-Fructose 6-phosphate'	85	258.12	396.8	308.49	88.308	-2	2	2	4	9	13	4	-3.93	-2.11	-0.89	-2.846	-6.95	0
'Succinyl-CoA'	91	862.57	982.37	627.76	354.61	-5	5	5	5	24	29	23	-4.04	-0.44	-2.19	-5.128	-12.59	0
'D-Glucose 6-phosphate'	92	258.12	395.75	331.6	64.155	-2	2	2	4	9	13	3	-4.24	-2.06	-0.92	-4.975	-9.08	0
'sn-Glycerol 3-phosphate'	93	170.06	312.13	244.45	67.677	-2	2	2	2	6	8	4	-2.86	-1.84	-0.75	-3.746	-7.84	0
'L-Cysteine'	97	121.16	258	211.71	46.292	0	0	2	1	2	3	2	-2.19	-2.57	-0.72	0.085	-2.43	1
'beta-Alanine'	99	89.093	241.27	178.75	62.52	0	0	2	1	2	3	2	-2.05	-3.26	0.74	-0.882	-3.38	0
'Propanoyl-CoA'	100	819.57	992.12	600.9	391.22	-4	4	4	5	22	27	21	-4.45	-0.2	-2.16	-4.137	-10.36	0
'D-Glucose 1-phosphate'	103	258.12	389.38	318.94	70.445	-2	2	2	4	9	13	3	-3.68	-2	-0.91	-4.715	-8.9	0
'IDP'	104	425.16	574.39	417.4	156.99	-3	3	3	3	14	17	6	-4.32	-1.37	-2.09	-3.729	-8.54	0
'UMP'	105	322.17	478.52	353.61	124.91	-2	2	2	3	10	13	4	-2.42	-2.22	-1.29	-3.452	-7.54	0
'Anthranilate'	108	136.13	272.95	123.13	149.82	-1	1	1	1	2	3	1	2.4	0.78	-1.3	1.268	-1.18	0
'Glycerone phosphate'	111	168.04	316.13	250.34	65.791	-2	2	2	1	6	7	4	-2.45	-1.49	-0.89	-3.155	-7.35	0
'CDP'	112	400.15	553.12	429.09	124.03	-3	3	3	4	13	17	6	-3.42	-1.96	-1.64	-4.636	-9.43	0
'D-Ribose 5-phosphate'	117	228.09	372.61	298.89	73.716	-2	2	2	3	8	11	3	-3.62	-2.07	-0.84	-4.604	-8.71	0
'D-Glyceraldehyde 3-phosphate'	118	168.04	316.45	259.72	56.733	-2	2	2	1	6	7	4	-2.67	-1.69	-0.92	NA	NA	0
'5-Phospho-alpha-D-ribose 1-diphosphate'	119	385.03	530.33	466.56	63.778	-5	5	5	2	14	16	7	-5.81	-0.74	-1.53	-5.932	-12.59	0
'Fumarate'	122	114.06	259.23	196.21	63.023	-2	2	2	0	4	4	2	2.16	0.21	-0.68	-0.446	-5.06	0
'L-Leucine'	123	131.17	283.99	136.56	147.43	0	0	2	1	2	3	3	-0.79	-1.82	-0.27	-4.137	-10.36	1
'D-Galactose'	124	180.16	313.41	231.14	82.27	0	0	0	5	6	11	1	-2.59	-2.57	0.64	NA	NA	0
'Glutathione disulfide'	127	610.62	760.18	622.81	137.37	-2	2	6	6	16	22	21	-3.46	-3.4	-3.8	-3.374	-8.37	0
'CMP-N-acetylneuraminate'	128	612.44	685.2	461.16	224.04	-2	2	2	9	19	28	11	-4.14	-2.55	-1.49	-5.271	-10.01	0
'IMP'	130	346.19	499.88	342.89	156.99	-2	2	2	3	11	14	4	-3.23	-2.06	-1.99	-4.227	-8.3	0
'dATP'	131	487.15	632.68	480.47	152.21	-4	4	4	2	15	17	8	-4.77	-0.66	-2.11	-2.774	-8.58	0
'Putrescine'	134	90.167	277.53	166.58	110.95	2	2	2	2	0	2	3	-0.94	-0.98	0.43	-0.466	-4.54	0
'L-Histidine'	135	155.15	310.22	184.93	125.29	0	0	2	2	3	5	3	-2.53	-3.09	-0.4	-1.418	-4.03	1
'myo-Inositol'	137	180.16	294.06	230.03	64.029	0	0	0	6	6	12	0	-3.71	-2.59	0.43	-3.861	-3.86	0
'GMP'	144	361.2	514.71	391.18	123.53	-2	2	2	5	11	16	4	-2.61	-2.37	-2.03	-4.067	-8.14	0
'Adenine'	147	135.13	268.05	157.47	110.57	0	0	0	2	3	5	0	-0.43	-0.38	-0.83	-2.133	-3.93	0
'L-Proline'	148	115.13	257.94	127.36	130.57	0	0	2	1	2	3	1	-1.48	-2.71	0.5	-0.06	-2.56	1
'L-Asparagine'	152	132.12	272.42	223.61	48.808	0	0	2	3	4	7	3	-2.9	-3.37	-1.36	-1.88	-4.4	1
'Nicotinamide'	153	122.12	261.82	119.68	142.15	0	0	0	2	3	5	1	0.47	-0.18	-1.92	-0.368	-0.37	0
'4-Hydroxybenzoate'	156	137.11	280.91	144.42	136.49	-1	1	1	1	3	4	1	2.18	1.58	-1.06	-4.227	-8.3	0
'Citrate'	158	189.1	324.62	271.66	52.96	-3	3	3	1	7	8	5	1.76	-1.33	-0.26	-1.198	-6.91	0
'Phenylpyruvate'	166	163.15	316.93	119.31	197.62	-1	1	1	0	3	3	3	2.15	1.3	-2.25	0.142	-3.52	0
'UDP-glucuronate'	167	577.26	724.13	550.78	173.34	-3	3	3	6	19	25	9	-3.97	-1.7	-1.45	-3.317	-7.82	0
'Benzoate'	180	121.11	263.3	91.967	171.33	-1	1	1	0	2	2	1	2.53	1.72	-1.24	1.559	-1.08	0
'L-Valine'	183	117.15	269.83	142.52	127.3	0	0	2	1	2	3	2	-1.15	-2.29	0.26	0.289	-2.21	1
'(S)-Lactate'	186	89.07	220.74	137.84	82.899	-1	1	1	1	3	4	1	0.42	-0.79	0.79	NA	NA	0
'L-Threonine'	188	119.12	263.36	181.59	81.766	0	0	2	2	3	5	2	-2.73	-3.01	0.6	-1.136	-3.64	1
'"2,3-Dihydroxybenzoate"'	196	153.11	286.49	165.85	120.64	-1	1	1	2	4	6	1	2.37	1.42	-1.35	1.621	-1.52	0
'3-Phospho-D-glycerate'	197	183.03	325.07	286.95	38.116	-3	3	3	1	7	8	4	-1.72	-2.26	-0.95	-3.362	-8.67	0
'"D-Glucono-1,5-lactone"'	198	178.14	313.98	241.52	72.458	0	0	0	4	6	10	1	-2.03	-2.16	0.52	-3.466	-3.47	0
'D-Ribulose 5-phosphate'	199	228.09	379.45	308.25	71.2	-2	2	2	3	8	11	6	-3.72	-1.81	-0.95	-2.692	-6.81	0
'dADP'	206	408.18	558.35	406.14	152.21	-3	3	3	2	12	14	6	-3.67	-1.57	-2.17	-2.774	-8.58	0
'Maltose'	208	342.3	440.45	328.25	112.21	0	0	0	8	11	19	4	-4.73	-3.01	0.23	-4.834	-4.83	0
'Adenosine'	212	267.24	417.44	250.14	167.31	0	0	0	4	7	11	2	-1.91	-1.21	-1.28	-0.755	-0.75	0
'Adenylyl sulfate'	224	425.27	573.08	416.97	156.11	-2	2	2	3	13	16	6	-3.94	-1.64	-2.11	-2.161	-6.66	0
'Acetyl phosphate'	227	138.02	269.79	194.56	75.225	-2	2	2	0	5	5	2	-1.52	-0.92	-0.9	-1.382	-5.59	0
'D-Xylulose 5-phosphate'	231	228.09	379.45	308.25	71.2	-2	2	2	3	8	11	6	-3.72	-1.81	-0.95	NA	NA	0
'3-Phospho-D-glyceroyl phosphate'	236	262.01	409.3	373.83	35.474	-4	4	4	1	10	11	6	-3.91	-1.14	-1.44	-4.559	-10.5	0
'dCMP'	239	305.18	471.09	320.77	150.32	-2	2	2	3	9	12	4	-1.35	-2.45	-1.39	-4.351	-8.42	0
'Guanine'	242	151.13	291.05	210.92	80.131	0	0	0	4	4	8	0	0.52	-1.34	-1.9	-0.96	-0.96	0
'Riboflavin'	255	376.36	489.52	250.76	238.76	0	0	0	5	9	14	5	0.01	-1.02	-2.13	0.095	0.1	0
'D-Gluconic acid'	257	195.15	329.47	243.42	86.044	-1	1	1	5	7	12	5	-2.48	-2.57	-0.09	-2.116	-5.75	0
'D-Glycerate'	258	105.07	231.81	173.44	58.369	-1	1	1	2	4	6	2	-0.63	-1.72	0.78	-1.431	-5.02	0
'Hypoxanthine'	262	136.11	270.54	157.7	112.84	0	0	0	2	4	6	0	-0.1	-0.55	-1.02	-1.11	-1.11	0
'L-Homoserine'	263	119.12	272.7	204.65	68.055	0	0	2	2	3	5	3	-2.81	-3.31	0.55	-1.289	-3.79	1
'D-Erythrose 4-phosphate'	279	198.07	347.44	282.15	65.287	-2	2	2	2	7	9	5	-3.29	-1.89	-0.93	NA	NA	0
'Inosine'	294	268.23	415.43	247.62	167.81	0	0	0	4	8	12	2	-1.58	-1.21	-0.99	-1.97	-1.97	0
'Orotate'	295	155.09	294.02	235.65	58.369	-1	1	1	2	6	8	1	0.81	0.52	-1.09	NA	NA	0
'Quinate'	296	191.16	315.74	234.6	81.138	-1	1	1	4	6	10	1	-1.49	-2.46	0.6	-2.023	-5.21	0
'Uridine'	299	244.2	384.32	239.27	145.04	0	0	0	4	7	11	2	-0.77	-2.5	-0.07	-1.581	-1.58	0
'Creatine'	300	130.13	271.33	181.89	89.44	0	0	2	2	3	5	3	-0.28	-1.59	-1.5	-1.258	-3.76	0
'ADP-ribose'	301	557.3	734.47	504.14	230.33	-2	2	2	6	17	23	9	-6.17	-1.8	-2.19	-4.193	-8.69	0
'Isocitrate'	311	189.1	310.55	247.77	62.772	-3	3	3	1	7	8	5	1.73	-0.35	-0.56	NA	NA	0
'Pyridoxine'	314	169.18	309.14	142.09	167.06	0	0	0	3	4	7	2	-0.32	-0.57	-1.02	-0.831	-0.9	0
'L-Carnitine'	318	161.2	288.49	106.59	181.9	0	0	2	1	3	4	4	0.6	-2.9	-1.6	NA	NA	0
'L-Citrulline'	327	175.19	358.76	269.45	89.314	1	1	3	4	4	8	6	-2.29	-3.48	-1.86	-1.373	-3.87	1
'D-Glucosamine'	329	180.18	322.45	243.08	79.376	1	1	1	5	5	10	1	-2.85	-2.73	0.49	-3.047	-3.27	0
'Deoxyguanosine'	330	267.24	417.89	277	140.89	0	0	0	5	7	12	2	0.01	-1.69	-1.39	-2.008	-2.01	0
'Acetoacetyl-CoA'	332	847.58	1009.4	600.67	408.71	-4	4	4	5	23	28	22	-5.07	-0.24	-2.16	-5.107	-11.34	0
'4-Aminobutanoate'	334	103.12	269.14	179.57	89.566	0	0	2	1	2	3	3	-1.7	-2.99	0.55	-0.637	-3.14	0
'(S)-Dihydroorotate'	337	157.1	291.41	232.16	59.249	0	0	2	2	6	8	1	0.02	-1.22	-1.59	-1.593	-5.1	0
'6-Phospho-D-gluconate'	345	273.11	422.71	357.04	65.665	-3	3	3	4	10	14	7	-3.58	-2.27	-1.12	NA	NA	0
'D-Glucosamine 6-phosphate'	352	258.14	403.91	342.9	61.01	-1	1	3	4	8	12	3	-6.77	-2.6	-0.87	-4.89	-8.36	0
'"D-Fructose 1,6-bisphosphate"'	354	336.08	485.41	417.74	67.677	-4	4	4	3	12	15	6	-5.58	-1.51	-1.33	-5.204	-11.02	0
'N-Acetyl-D-glucosamine 6-phosphate'	357	299.17	429.88	326.1	103.78	-2	2	2	4	10	14	4	-3.91	-2.29	-1.12	NA	NA	0
'dAMP'	360	329.21	483.9	331.69	152.21	-2	2	2	2	9	11	4	-2.58	-2.44	-2.09	-2.312	-6.39	0
'dGMP'	362	345.21	501.31	382.93	118.37	-2	2	2	4	10	14	4	-1.63	-2.01	-2.1	-3.924	-7.99	0
'dTDP'	363	399.16	568.95	393.72	175.23	-3	3	3	2	12	14	6	-2.17	-1.55	-1.63	-2.537	-7.58	0
'dTMP'	364	320.19	494.73	319.49	175.23	-2	2	2	2	9	11	4	-1.08	-2.14	-1.41	NA	NA	0
'Cytosine'	380	111.1	246.51	156.44	90.069	0	0	0	3	3	6	0	0.8	-1.89	-1.11	-1.962	-1.97	0
'Guanosine'	387	283.24	434.76	301.29	133.47	0	0	0	6	8	14	2	-0.96	-2.11	-1.3	-1.466	-1.47	0
'L-Isoleucine'	407	131.17	291.02	141.45	149.57	0	0	2	1	2	3	3	-0.79	-1.73	-0.06	0.799	-1.7	1
'L-Pipecolate'	408	129.16	266.62	123.84	142.78	0	0	2	1	2	3	1	-1.13	-2.17	0.09	0.243	-2.26	0
'cis-Aconitate'	417	171.08	291.36	209.72	81.641	-3	3	3	0	6	6	4	3.32	-0.41	-1.41	-0.179	-5.82	0
'trans-Cinnamate'	423	147.15	311.98	97.882	214.1	-1	1	1	0	2	2	2	3.18	2.38	-2.38	1.212	-1.42	0
'N-Acetylornithine'	437	174.2	341.68	232.49	109.19	0	0	2	2	4	6	5	-1.92	-2.68	-1.59	-2.063	-4.56	0
'N-Carbamoyl-L-aspartate'	438	174.11	307.28	252.31	54.972	-1	1	3	3	6	9	5	1.16	-1.17	-1.71	NA	NA	0
'dCTP'	458	463.13	620.11	469.79	150.32	-4	4	4	3	15	18	8	-3.54	-0.98	-1.7	-4.813	-10.62	0
'dTTP'	459	478.14	643.17	467.94	175.23	-4	4	4	2	15	17	8	-3.27	-0.65	-1.68	-3.497	-9.31	0
'Cytidine'	475	243.22	384.4	240.24	144.16	0	0	0	5	7	12	2	-0.68	-2.66	-1.25	-1.808	-1.81	0
'Tyramine'	483	138.19	311.29	134.8	176.49	1	1	1	2	1	3	2	0.89	-0.14	-1.38	0.782	-2.01	0
'Shikimate'	493	173.14	305.55	219.76	85.792	-1	1	1	3	5	8	1	-0.81	-1.7	0.07	-2.22	-4.74	0
'ADP-glucose'	498	587.33	741.58	507.98	233.6	-2	2	2	7	18	25	9	-6.24	-1.76	-2.09	-4.369	-8.87	0
'Deoxyadenosine'	559	251.24	400.72	225.99	174.73	0	0	0	3	6	9	2	-0.93	-0.95	-1.37	-0.204	-0.2	0
'"3',5'-Cyclic AMP"'	575	328.2	449.87	289.1	160.77	-1	1	1	2	9	11	1	-2.56	-2.29	-1.96	1.221	-2.27	0
'N-Acetyl-L-glutamate'	624	187.15	337.9	249.22	88.685	-2	2	2	1	6	7	5	1.88	-0.48	-1.55	-2.131	-6.84	0
'Pyridoxamine phosphate'	647	247.17	404.82	261.16	143.66	-1	1	3	2	6	8	4	-3.96	-0.99	-1.57	-3.532	-6.99	0
'"LL-2,6-Diaminoheptanedioate"'	666	190.2	376.62	292.97	83.653	0	0	4	2	4	6	6	-4.12	-4.13	-1.13	NA	NA	0
'2-Deoxy-D-ribose 5-phosphate'	673	212.09	361.45	276.42	85.037	-2	2	2	2	7	9	3	-2.64	-2.14	-0.76	-4.235	-8.34	0
'dCDP'	705	384.15	545.6	395.28	150.32	-3	3	3	3	12	15	6	-2.45	-1.87	-1.66	-3.853	-8.89	0
'Malate'	711	132.07	257.53	200.68	56.859	-2	2	2	1	5	6	3	1	-0.87	0.21	NA	NA	0
'Pterin'	715	163.14	301.97	188.88	113.09	0	0	0	3	5	8	0	0.42	-0.96	-2.26	-1.074	-1.07	0
'Pyridine'	747	79.1	209.98	25.061	184.92	0	0	0	0	1	1	0	0.85	0.7	0.49	0.836	0.83	0
'Urocanate'	785	137.12	316.03	161.68	154.35	-1	1	1	1	3	4	2	1.17	0	-0.82	0.112	-2.92	0
'Creatinine'	791	113.12	257.54	134.89	122.65	1	1	1	2	3	5	0	-0.45	-1.31	-1.58	-0.802	-1.05	0
'L-Histidinol'	860	142.18	292.89	163.2	129.69	1	1	1	3	2	5	3	-1.38	-1.27	-0.04	-1.629	-3.74	0
'Pantothenate'	864	218.23	380.08	209.25	170.83	-1	1	1	3	6	9	6	0.73	-0.83	-1.71	-0.856	-3.66	0
'"3',5'-Cyclic GMP"'	942	344.2	465.42	336.1	129.32	-1	1	1	4	10	14	1	-1.61	-2.15	-1.99	0.959	-2.54	0
'L-2-Aminoadipate'	956	160.15	329.15	239.33	89.817	-1	1	3	1	4	5	5	-0.83	-3.43	-0.69	-0.664	-4.15	0
'O-Acetyl-L-serine'	979	147.13	312.22	198.88	113.34	0	0	2	1	4	5	4	-2.59	-2.85	0.07	-0.499	-3.02	0
'O-Phospho-L-serine'	1005	183.06	339.7	308.75	30.945	-2	2	4	1	6	7	4	-4.26	-2.32	-0.97	NA	NA	0
'4-Hydroxy-L-proline'	1015	131.13	271.7	176.97	94.723	0	0	2	2	3	5	1	-2.46	-3.31	0.57	-0.35	-2.85	0
'"N,N-Dimethylglycine"'	1026	103.12	246.93	104.16	142.78	0	0	2	1	2	3	2	-1.54	-1.7	0.96	-0.191	-2.69	0
'N8-Acetylspermidine'	1029	189.3	433.57	190.78	242.78	2	2	2	3	2	5	8	-0.4	-0.26	-2.07	-0.718	-4.73	0
'4-Guanidinobutanoate'	1035	144.15	314.01	217.65	96.359	0	0	2	3	3	6	5	0.35	-1.52	-1.72	NA	NA	0
'N-Acetyl-L-aspartate'	1042	173.12	302.7	216.4	86.295	-2	2	2	1	6	7	4	1.52	-0.67	-1.26	-2.209	-6.94	0
'Thiamin monophosphate'	1081	343.32	491.92	280.71	211.21	-1	1	3	2	6	8	6	0.89	-2.75	-4.03	NA	NA	0
'D-Fructose 1-phosphate'	1094	258.12	393.96	308.29	85.666	-2	2	2	4	9	13	4	-3.93	-2.11	-0.89	NA	NA	0
'Sorbitol 6-phosphate'	1096	262.05	NA	NA	NA	NA	NA	NA	NA	NA	NA	NA	NA	0	0	-4.812	-8.92	0
'Trimethylamine N-oxide'	1104	75.11	306.21	108.97	197.25	0	0	0	0	2	2	0	-0.29	-2.01	-0.11	-2.516	-2.52	0
'Cys-Gly'	1419	178.21	328.25	266.74	61.514	0	0	2	2	4	6	4	-2.32	-2.6	-1.74	-1.148	-4.15	0
'Glu-Glu'	1425	274.23	436.21	355.95	80.257	-2	2	4	2	8	10	9	0.02	-3.2	-1.92	-2.314	-6.82	0
'Hexanoic acid'	1585	115.15	283.85	95.538	188.31	-1	1	1	0	2	2	4	3.14	1.88	-1.08	1.716	-0.49	0
'Octylamine'	1740	130.25	346.08	83.674	262.41	1	1	1	1	0	1	6	2.7	3.24	-2.55	3.094	0.08	0
'Piperidine'	1746	86.155	226.71	46.95	179.76	1	1	1	1	0	1	0	0.64	0.97	0.16	0.612	-2.33	0
'Homocystine'	1817	268.35	486.08	377.9	108.18	0	0	4	2	4	6	9	-3.79	-4.15	-1.78	0.849	-1.66	0
'5-Oxoproline'	1879	128.11	265.79	166.04	99.755	-1	1	1	1	4	5	1	0.44	-0.73	-0.85	-1.348	-4.68	0
'Acetylcholine'	1996	146.21	321.2	57.033	264.17	1	1	1	0	2	2	4	0.17	-2.91	-3.13	NA	NA	0
'Methylmalonate'	2170	116.07	250.02	172.66	77.364	-2	2	2	0	4	4	2	2.14	0.17	0.1	NA	NA	0
'2-Methylmaleate'	2226	128.08	270.15	178.58	91.578	-2	2	2	0	4	4	2	2.78	0.21	-0.91	-0.027	-4.61	0
'Castanospermine'	2256	190.22	311.18	152.8	158.38	1	1	1	5	4	9	0	-2.24	-2.13	0.77	-1.614	-1.81	0
'5-Methylcytosine'	2376	125.13	266.06	148.56	117.49	0	0	0	3	3	6	0	1.16	-1.65	-1.17	-1.547	-1.55	0
'1-Methyladenosine'	2494	281.27	428.63	204.21	224.42	0	0	0	4	7	11	2	-0.81	-1.62	-1.31	-1.965	-2.04	0
'3-Methylbutanamine'	2640	88.171	259.82	83.586	176.24	1	1	1	1	0	1	2	0.97	1.15	-0.73	1.41	-1.6	0
'Dodecanedioic acid'	2678	228.28	470.02	191.63	278.38	-2	2	2	0	4	4	11	6.07	2.86	-2.9	2.725	-1.53	0
'Monomethyl sulfate'	2704	111.1	231.23	169.72	61.514	-1	1	1	0	4	4	1	-0.84	-1.94	-0.56	-0.595	-4.09	0
'N-Acetylputrescine'	2714	131.2	324.85	153.26	171.58	1	1	1	2	2	4	4	-0.32	-0.04	-1.33	-0.817	-3.71	0
'2-Methylpropanamine'	2787	74.145	231.27	75.407	155.86	1	1	1	1	0	1	1	0.62	0.54	0.07	0.9	-2.11	0
'3-Guanidinopropanoate'	3065	130.13	287.51	217.19	70.319	0	0	2	3	3	6	4	0	-1.7	-1.59	-1.472	-3.97	0
'Dimethylbenzimidazole'	3114	146.19	303.66	63.389	240.27	0	0	0	1	1	2	0	2.04	1.88	-1.85	2.35	2.3	0
'"L-2,4-Diaminobutanoate"'	3283	119.14	291.67	233.68	57.991	1	1	3	2	2	4	3	-3.06	-3.66	0.36	-1.656	-4.96	0
'L-3-Amino-isobutanoate'	3284	103.12	256.07	165.88	90.195	0	0	2	1	2	3	2	-1.72	-2.97	0.55	-0.528	-3.03	0
'"2,3-Bisphosphoglycerate"'	3339	261	397.82	370.77	27.046	-5	5	5	0	10	10	6	-2.82	-1.55	-1.44	-5.388	-12.2	0
'N-(L-Arginino)succinate'	3406	289.27	484.92	354.6	130.32	0	0	6	4	6	10	11	-1.08	-3.25	-2.8	-0.487	-4.44	0
'(R)-S-Lactoylglutathione'	3451	378.38	536.64	388.46	148.19	-1	1	3	4	10	14	12	-1.78	-2.86	-2.94	NA	NA	0
'"Pyridine-2,3-dicarboxylate"'	3722	165.1	292.75	163.19	129.57	-2	2	2	0	5	5	2	2.11	0.15	-1.61	-0.441	-4.55	0
'N6-Methyl-2'-deoxyadenosine'	3795	265.27	431.5	172.74	258.76	0	0	0	3	6	9	3	-0.26	-0.58	-1.63	0.207	0.2	0
'1-Phospho-alpha-D-galacturonate'	4037	271.1	391.69	353.83	37.864	-3	3	3	3	10	13	3	-2.55	-1.69	-0.91	NA	NA	0
'N-Acetyl-D-glucosamine 1-phosphate'	4256	299.17	399.62	309.55	90.069	-2	2	2	4	10	14	4	-3.35	-2.26	-1.09	-4.737	-8.92	0
'Nicotinamide hypoxanthine dinucleotide'	4423	663.4	870.1	545.8	324.3	-1	1	3	7	19	26	11	-4.89	-1.07	-2.23	NA	NA	0
'"1-Methyl-4-phenyl-1,2,3,6-tetrahydropyridine"'	4599	174.26	339.21	19.821	319.39	1	1	1	1	0	1	1	2.13	2.69	-1.43	2.521	0.86	0
'4-(beta-Acetylaminoethyl)imidazole'	5135	153.18	322.48	121.21	201.27	0	0	0	2	3	5	3	-0.15	-0.13	-1.84	-0.888	-1.44	0
'Sedoheptulose 7-phosphate'	5382	290.04	NA	NA	NA	NA	NA	NA	NA	NA	NA	NA	NA	0	0	-3.192	-7.3	0
'1-Aminopropan-2-ol'	5771	76.118	223.71	124.58	99.126	1	1	1	2	1	3	1	-0.97	-1.03	1	-1.127	-3.74	0
'2-Oxopentanoic acid'	6255	115.11	267.13	130.14	136.99	-1	1	1	0	3	3	3	1.38	0.48	-0.55	-0.221	-3.87	0
'Octanoic acid'	6423	143.2	336.44	95.538	240.9	-1	1	1	0	2	2	6	4.23	2.92	-2.2	2.735	0.53	0
'2-Keto-D-gluconic acid'	6473	194.04	NA	NA	NA	NA	NA	NA	NA	NA	NA	NA	NA	0	0	NA	NA	0
'Hydroxyatrazine'	6552	197.24	381.7	130.49	251.21	0	0	0	3	4	7	2	2.37	-0.2	-1.89	0.829	0.74	0
'Triethanolamine'	6771	150.2	318.53	180.03	138.5	1	1	1	4	3	7	6	-1.79	-1.38	0.52	-0.988	-1.89	0
'Diethanolamine'	6772	106.14	266.75	150.77	115.98	1	1	1	3	2	5	4	-1.57	-1.41	0.65	-1.761	-3.65	0
'Tolazoline'	7147	160.22	316.06	34.402	281.65	1	1	1	1	1	2	2	0.82	2.05	-2.07	1.804	-0.19	0
'Tromethamine'	7182	122.14	262.09	181.2	80.886	1	1	1	4	3	7	3	-2.88	-2.08	0.76	-2.515	-5	0
'Azelaic acid'	8261	186.21	390.8	191.41	199.38	-2	2	2	0	4	4	8	4.45	1.37	-1.92	1.196	-3.07	0
'Sebacic acid'	8277	200.23	417.3	191.75	225.55	-2	2	2	0	4	4	9	4.99	1.93	-2.35	1.706	-2.55	0
'Melamine'	8737	126.12	266.71	235.89	30.82	0	0	0	6	3	9	0	1.83	-1.87	-2.3	-1.37	-1.38	0
'Benzylsuccinate'	9816	206.19	341.23	137.95	203.28	-2	2	2	0	4	4	5	3.86	1.43	-2.15	0.443	-4.02	0
'Pseudopelletierine'	10865	154.23	285.68	66.802	218.88	1	1	1	1	1	2	0	0.7	1	0.26	1.049	-0.92	0
'2-Benzimidazolylguanidine'	10898	175.19	334.72	161.62	173.09	1	1	1	4	2	6	2	0.33	0.52	-2.87	0.637	-1.22	0
'Leu-leu-tyr'	11331	407.5	475.05	201.32	273.73	0	0	2	4	7	11	11	2.31	-0.3	-3.93	1.031	-1.53	0
'Heptanoic acid'	17714	130.1	NA	NA	NA	NA	NA	NA	NA	NA	NA	NA	NA	0	0	2.226	0.02	0
