# Supplementary material for: Hydrophobicity and Charge Shape Cellular Metabolite Concentrations
Source: PLOS journal article supplement (doi:10.1371/journal.pcbi.1002166), 2011-10-06

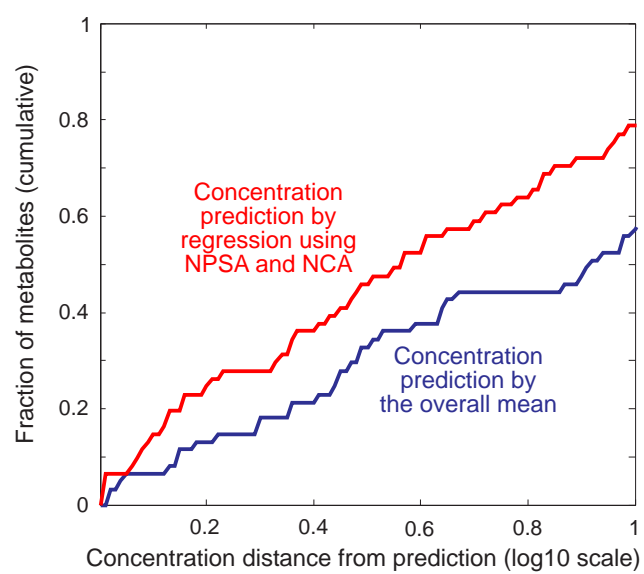

Supplement: S5 (10.1371/journal.pcbi.1002166.s005) [file journal.pcbi.1002166.s005]
